# Supplementary material for: Iridium(iii) phosphors with bis(diphenylphorothioyl)amide ligand for efficient green and sky-blue OLEDs with EQE of nearly 28%
Source: Royal Society of Chemistry journal article supplement (doi:10.1039/c8tc02265h), 2018-01-01
Supplement: c8tc02265h1.pdf [file c8tc02265h1.pdf]

## Electronic Supplementary Information

### **Iridium(III) phosphors with bis(diphenylphorothioyl)amide ligand for efficient green and sky-blue OLEDs with EQE nearly 28%**

Jing-Cheng Xia<sup>1</sup>, Xiao Liang<sup>1</sup>, Zhi-Ping Yan<sup>1</sup>, Zheng-Guang Wu<sup>1</sup>, Yue Zhao<sup>1</sup>, You-Xuan Zheng<sup>1,2,\*</sup> and Wen-Wei Zhang<sup>1,\*</sup>

<sup>1</sup> State Key Laboratory of Coordination Chemistry, Jiangsu Key Laboratory of Advanced Organic Materials, Collaborative Innovation Center of Advanced Microstructures, School of Chemistry and Chemical Engineering, Nanjing University, Nanjing 210093, P. R. China, \*Email - yxzheng@nju.edu.cn; wwzhang@nju.edu.cn

<sup>2</sup> Shenzhen Research Institute of Nanjing University, Shenzhen 518057, P. R. China

#### **General information**

<sup>1</sup>H NMR spectra were measured on a Bruker AM 400 spectrometer. The high resolution electrospray ionization mass spectra (HR ESI-MS) were recorded on an Bruker MTQ III q-TOF. TG measurements were carried out on a TG/DSC\_STA449F3 analyzer (METTLER). UV-vis absorption and photoluminescence spectra were measured on a Shimadzu UV-2550 and a Hitachi F-4600 spectrophotometer at room temperature, respectively. Cyclic voltammetry measurements were conducted on a chi600e electrochemical workstation using Fc<sup>+</sup>/Fc as the internal standard and scan rate of 0.1 V s<sup>-1</sup>.

#### **X-ray crystallography**

X-ray crystallographic measurements of the single crystals were carried out on a Bruker SMART CCD diffractometer (Bruker Daltonic Inc.) using monochromated Mo K $\alpha$  radiation ( $\lambda = 0.71073 \text{ \AA}$ ) at room temperature. Cell parameters were retrieved using SMART software and refined using SAINT program to reduce the highly redundant data sets. Data were collected using a narrow-frame method with scan width of 0.30° in  $\omega$  and an exposure time of 5 s per frame. Absorption corrections were applied using SADABS supplied by Bruker. The structures were solved by Patterson methods and refined by full-matrix least-squares on  $F^2$  using the program SHELXS-97. The positions of metal atoms and their first coordination spheres were located from direct-

methods E-maps, other non-hydrogen atoms were found in alternating difference Fourier syntheses and least-squares refinement cycles and during the final cycles refined anisotropically. Hydrogen atoms were placed in calculated position and refined as riding atoms with a uniform value of  $U_{iso}$ .

### OLEDs fabrication and measurement

All OLEDs were fabricated on the pre-patterned ITO-coated glass substrate with a sheet resistance of  $15 \Omega \text{ sq}^{-1}$ . The deposition rate for organic compounds is  $1\text{-}2 \text{ \AA s}^{-1}$ . The phosphor and host were co-evaporated from two separate sources. The cathode consisting of LiF/Al was deposited by evaporation of LiF with a deposition rate of  $0.1 \text{ \AA s}^{-1}$  and then by evaporation of Al metal with a rate of  $3 \text{ \AA s}^{-1}$ . The effective area of the emitting diode is  $0.1 \text{ cm}^2$ . The characteristics of the devices were measured with a computer controlled KEITHLEY 2400 source meter with a calibrated silicon diode in air without device encapsulation. On the basis of the uncorrected PL and EL spectra, the CIE coordinates were calculated using a test program of the spectra scan PR650 spectrophotometer.

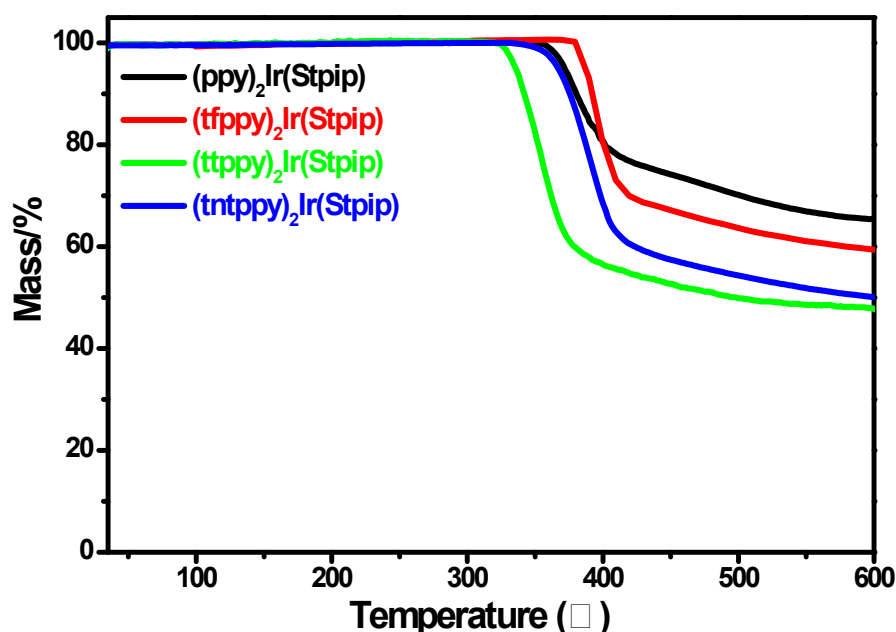

Fig. S1 The TG curves of  $\text{Ir}(\text{ppy})_2(\text{Stpip})$ ,  $\text{Ir}(\text{tfppy})_2(\text{Stpip})$ ,  $\text{Ir}(\text{ttpy})_2(\text{Stpip})$  and  $\text{Ir}(\text{tntppy})_2(\text{Stpip})$ .

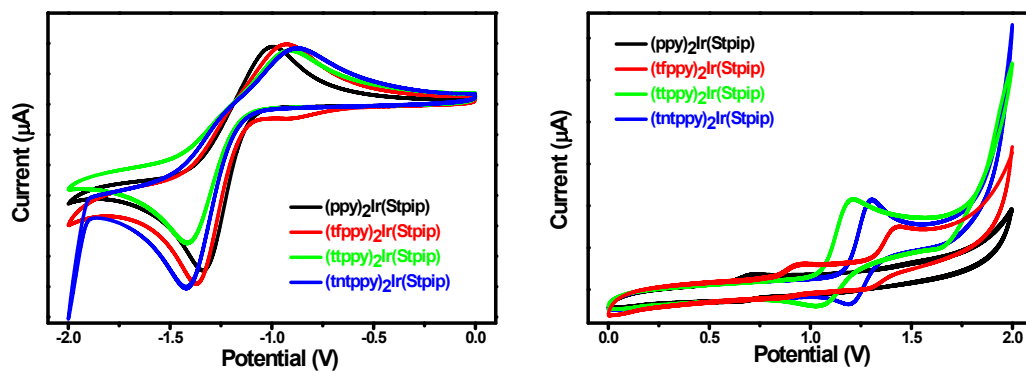

Fig. S2 The cyclic voltammogram curves of  $\text{Ir}(\text{ppy})_2(\text{Stpip})$ ,  $\text{Ir}(\text{tfppy})_2(\text{Stpip})$ ,  $\text{Ir}(\text{tpppy})_2(\text{Stpip})$  and  $\text{Ir}(\text{tntppy})_2(\text{Stpip})$  in degassed  $\text{CH}_2\text{Cl}_2$  solution at room temperature.

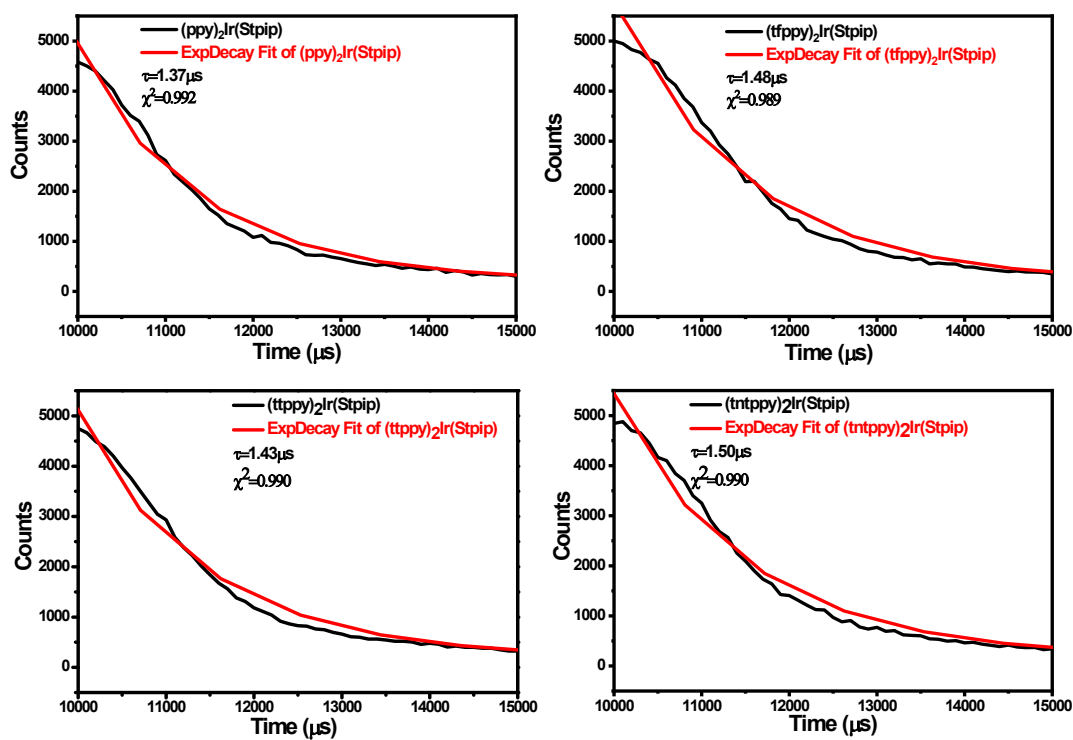

Fig. S3 The lifetime curves of  $\text{Ir}(\text{ppy})_2(\text{Stpip})$ ,  $\text{Ir}(\text{tfppy})_2(\text{Stpip})$ ,  $\text{Ir}(\text{tpppy})_2(\text{Stpip})$  and  $\text{Ir}(\text{tntppy})_2(\text{Stpip})$  in degassed  $\text{CH}_2\text{Cl}_2$  solution at room temperature.

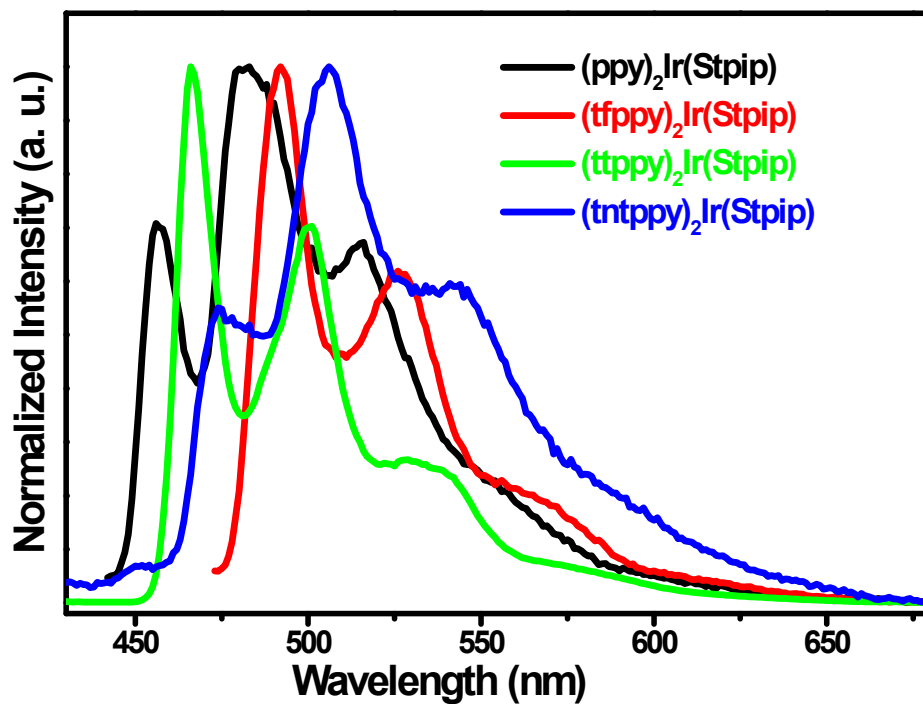

Fig. S4 Emission spectra of Ir(ppy)<sub>2</sub>(Stpip), Ir(tfppy)<sub>2</sub>(Stpip), Ir(tpppy)<sub>2</sub>(Stpip) and Ir(tntppy)<sub>2</sub>(Stpip) in degassed CH<sub>2</sub>Cl<sub>2</sub> solutions ( $5 \times 10^{-5}$  mol L<sup>-1</sup>) at 77 K.

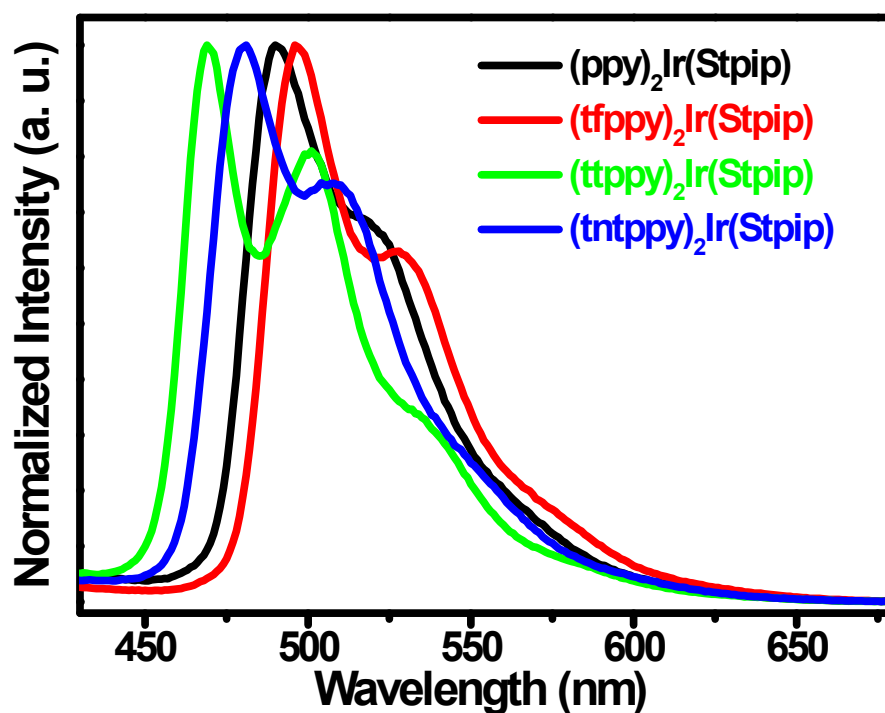

Fig. S5 The PL spectra of Ir(ppy)<sub>2</sub>(Stpip), Ir(tfppy)<sub>2</sub>(Stpip), Ir(tpppy)<sub>2</sub>(Stpip) and Ir(tntppy)<sub>2</sub>(Stpip) dopants with the host.

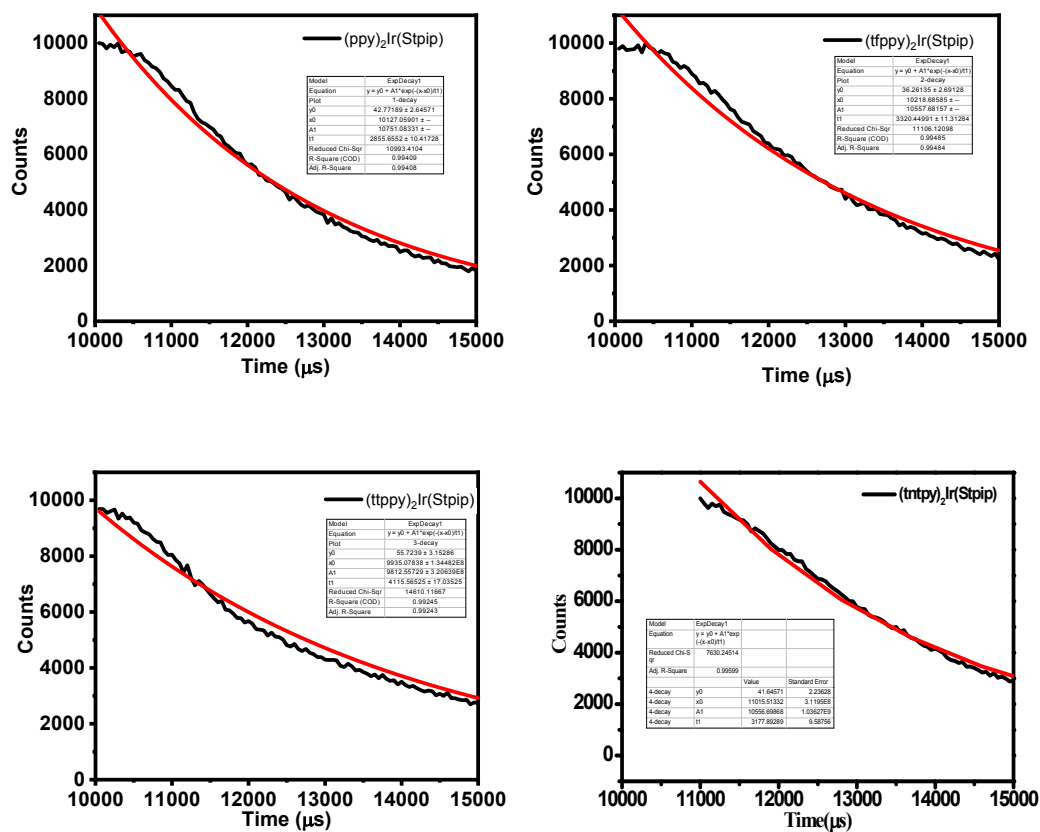

Fig. S6 The lifetime curves of Ir(ppy)<sub>2</sub>(Stpip) ( $\tau = 2.86 \mu\text{s}$ ), Ir(tfppy)<sub>2</sub>(Stpip) ( $\tau = 3.32 \mu\text{s}$ ), Ir(tppy)<sub>2</sub>(Stpip) ( $\tau = 4.11 \mu\text{s}$ ) and Ir(tnppy)<sub>2</sub>(Stpip) ( $\tau = 3.18 \mu\text{s}$ ) dopant with the host.

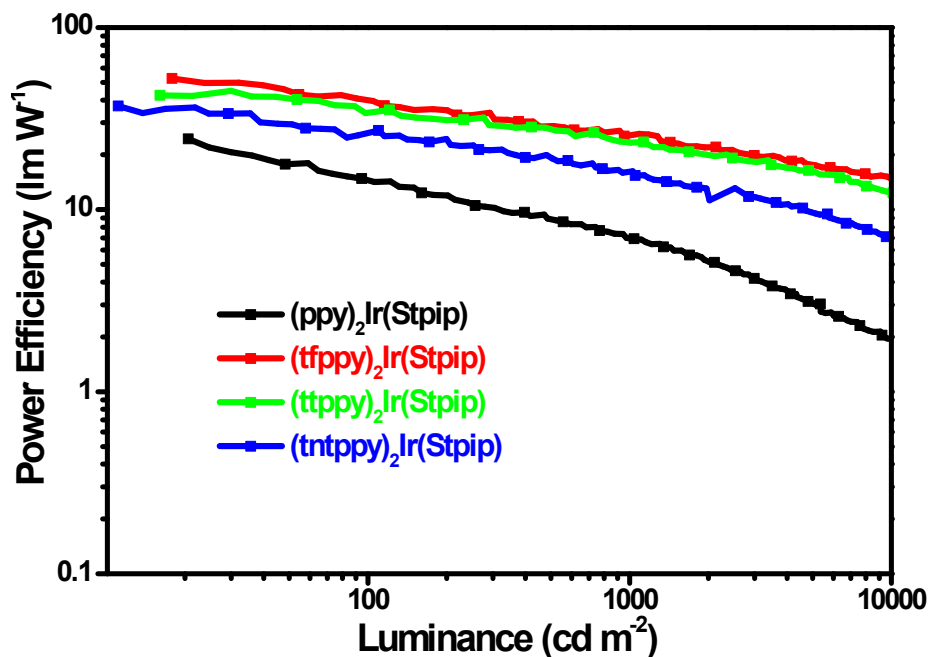

Fig. S7 Power efficiency–luminance ( $\eta_p$ - $L$ ) curves of D1-D4.

## Display Report

**Analysis Info**  
Analysis Name: D:\Data\YangNan\NAN DA\ZYX\20180328\NJU-MS-180328001000003.d  
Method: DirectInfusion\_TuneLow\_pos.m  
Sample Name: Ppy  
Comment:  
Acquisition Date: 03/29/2018 14:43:57 PM  
Operator: BDAL@DE  
Instrument: micrOTOF-Q III 8228 888.20519

### Acquisition Parameter

|             |          |                       |           |                  |           |
|-------------|----------|-----------------------|-----------|------------------|-----------|
| Source Type | ESI      | Ion Polarity          | Positive  | Set Nebulizer    | 0.4 Bar   |
| Focus       | Active   | Set Capillary         | 4500 V    | Set Dry Heater   | 180 °C    |
| Scan Begin  | 50 m/z   | Set End Plate Offset  | -500 V    | Set Dry Gas      | 4.0 l/min |
| Scan End    | 1500 m/z | Set Collision Cell RF | 640.0 Vpp | Set Divert Valve | Waste     |

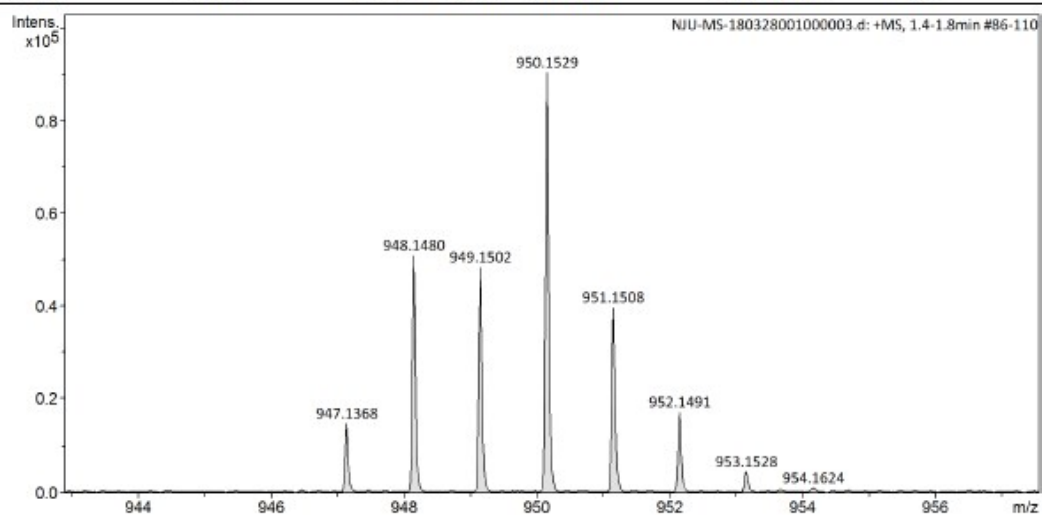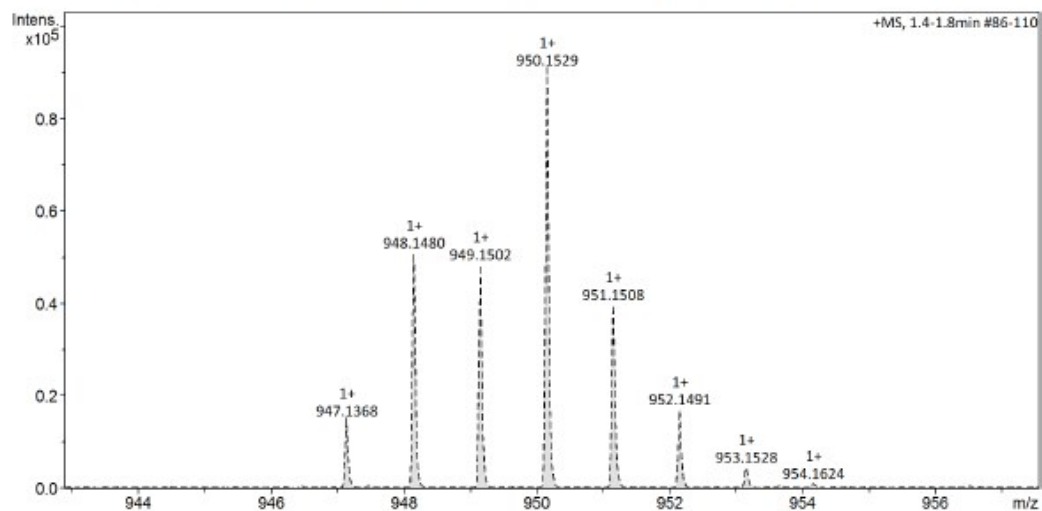

**Fig. S8** The mass spectrum of Ir(ppy)<sub>2</sub>(Stip).

## Display Report

### Analysis Info

Analysis Name D:\Data\YangNan\NAN DA\ZYX\20180328\NJU-MS-180328002000001.d  
Method DirectInfusion\_TuneLow\_pos.m  
Sample Name Tfppy  
Comment

Acquisition Date 03/29/2018 15:15:59 PM

Operator BDAL@DE

Instrument micrOTOF-Q III 8228888.20519

### Acquisition Parameter

|             |          |                       |           |                  |           |
|-------------|----------|-----------------------|-----------|------------------|-----------|
| Source Type | ESI      | Ion Polarity          | Positive  | Set Nebulizer    | 0.4 Bar   |
| Focus       | Active   | Set Capillary         | 4500 V    | Set Dry Heater   | 180 °C    |
| Scan Begin  | 50 m/z   | Set End Plate Offset  | 1500 V    | Set Dry Gas      | 4.0 l/min |
| Scan End    | 1500 m/z | Set Collision Cell RF | 640.0 Vpp | Set Divert Valve | Waste     |

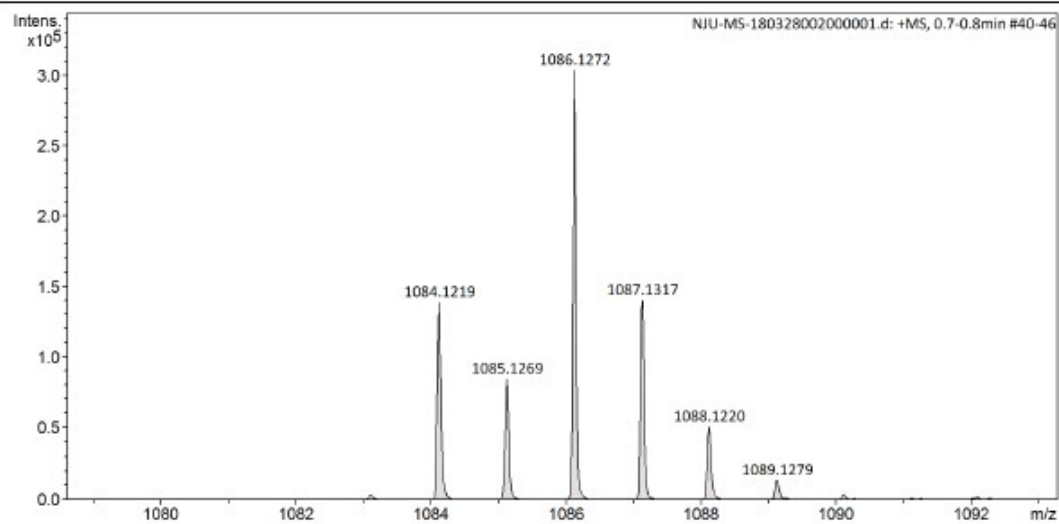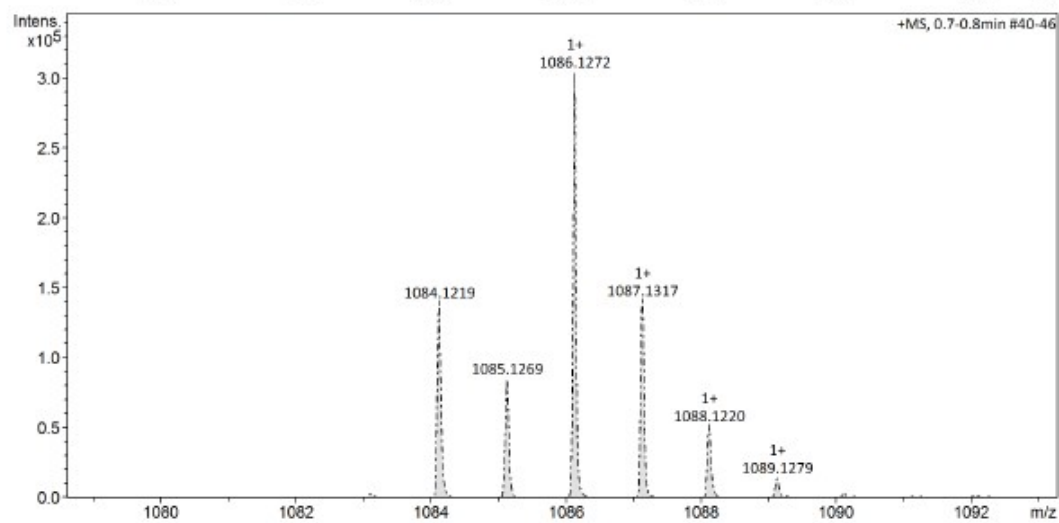

Fig. S9 The mass spectrum of Ir(tfppy)<sub>2</sub>(Stpip).

## Display Report

**Analysis Info**  
Analysis Name D:\Data\YangNan\NAN DAIZYX\20180328\WJU-MS-180328004000001.d Acquisition Date 03/29/2018 15:05:14 PM  
Method DirectInfusion\_TuneLow\_pos.m Operator BDAL@DE  
Sample Name Ttpy Instrument micrOTOF-Q III 8228888.20519  
Comment

### Acquisition Parameter

|             |          |                       |           |                  |           |
|-------------|----------|-----------------------|-----------|------------------|-----------|
| Source Type | ESI      | Ion Polarity          | Positive  | Set Nebulizer    | 0.4 Bar   |
| Focus       | Active   | Set Capillary         | 4500 V    | Set Dry Heater   | 180 °C    |
| Scan Begin  | 50 m/z   | Set End Plate Offset  | -500 V    | Set Dry Gas      | 4.0 l/min |
| Scan End    | 1500 m/z | Set Collision Cell RF | 640.0 Vpp | Set Divert Valve | Waste     |

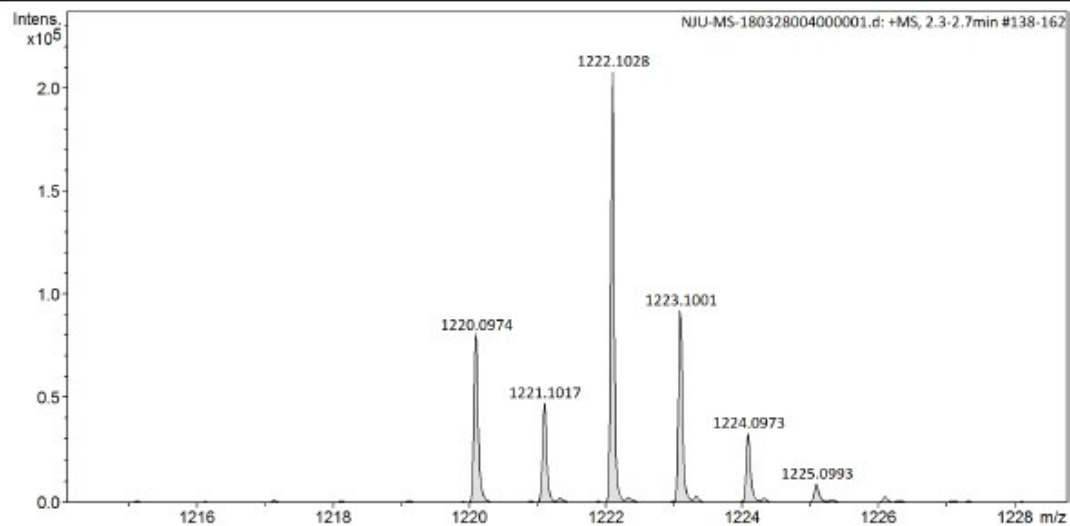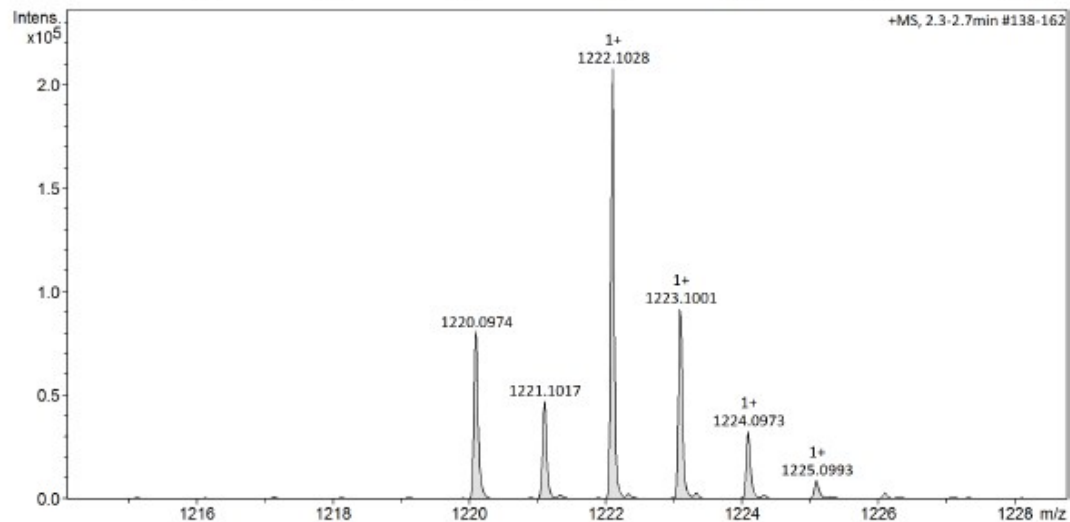

**Fig. S10** The mass spectrum of Ir(tppy)<sub>2</sub>(Stpip).



## Display Report

### Analysis Info

Analysis Name D:\Data\YangNan\NAN DA\ZYX\20180328\NJU-MS-180328003000001.d  
Method DirectInfusion\_TuneLow\_pos.m  
Sample Name Tntpy  
Comment

Acquisition Date 03/29/2018 16:35:17 PM

Operator BDAL@DE

Instrument micrOTOF-Q III 8228888.20519

### Acquisition Parameter

|             |          |                       |           |                  |           |
|-------------|----------|-----------------------|-----------|------------------|-----------|
| Source Type | ESI      | Ion Polarity          | Positive  | Set Nebulizer    | 0.4 Bar   |
| Focus       | Active   | Set Capillary         | 4500 V    | Set Dry Heater   | 180 °C    |
| Scan Begin  | 50 m/z   | Set End Plate Offset  | -500 V    | Set Dry Gas      | 4.0 l/min |
| Scan End    | 1500 m/z | Set Collision Cell RF | 640.0 Vpp | Set Divert Valve | Waste     |

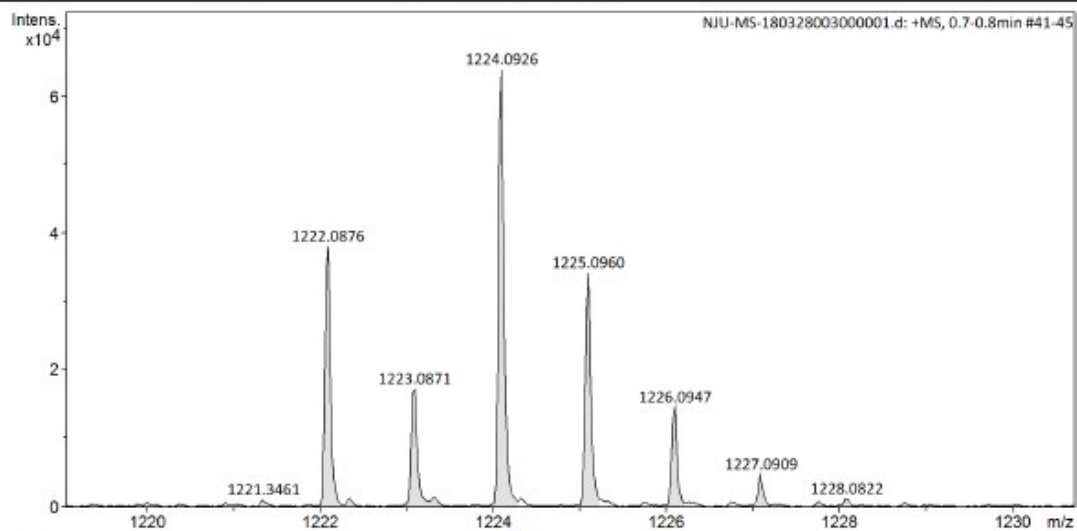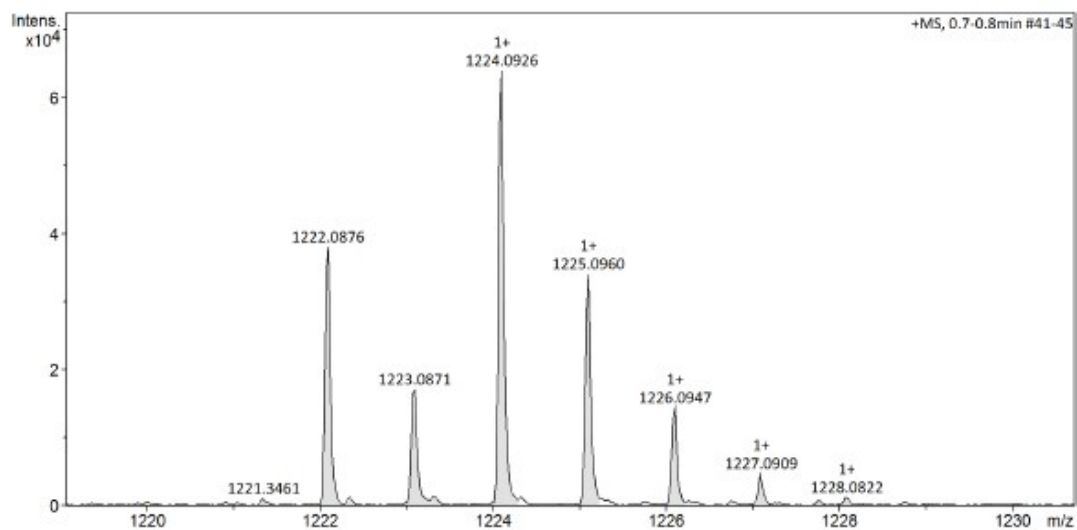

Fig. S11 The mass spectrum of Ir(tntpy)<sub>2</sub>(Stpip).

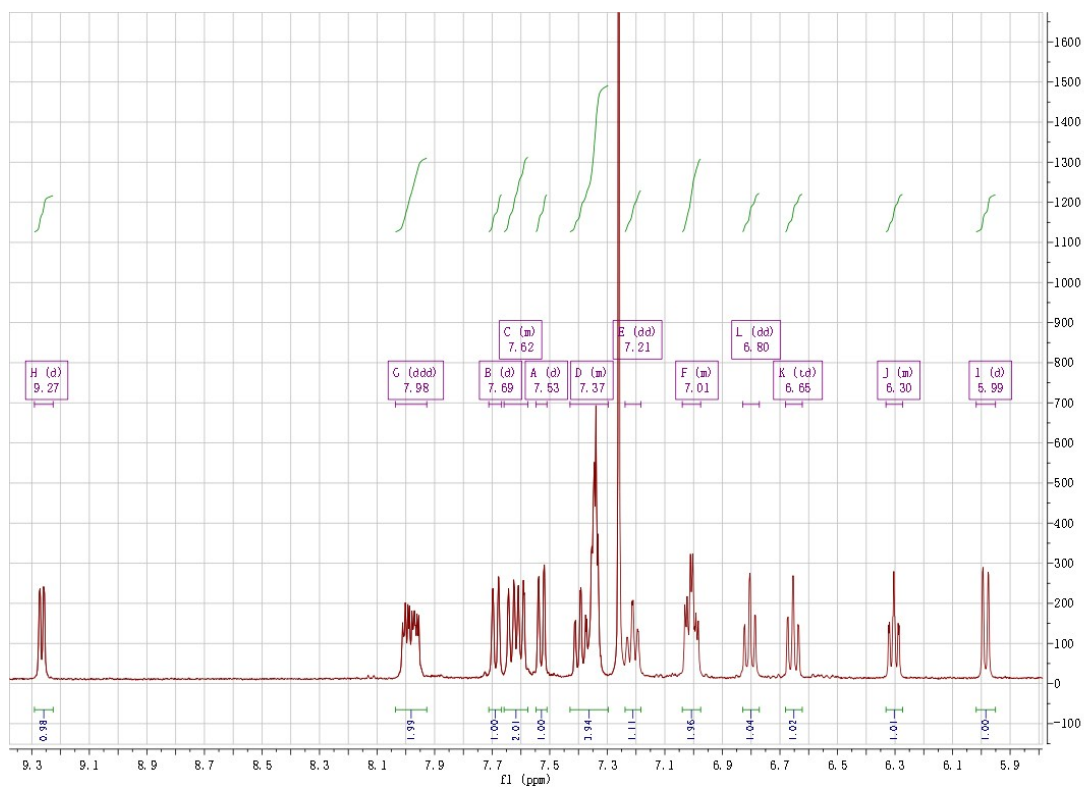

Fig. S12 The  $^1\text{H}$  NMR spectrum of  $\text{Ir}(\text{ppy})_2(\text{Stpip})$ .

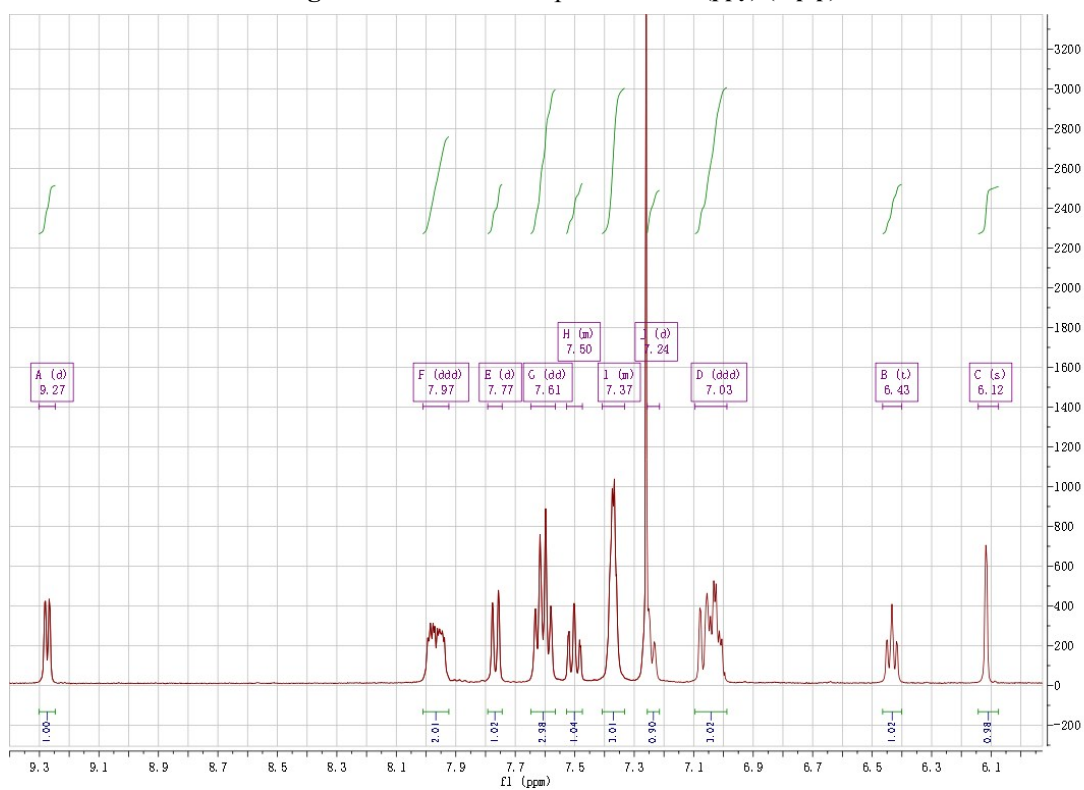

Fig. S13 The  $^1\text{H}$  NMR spectrum of  $\text{Ir}(\text{tfppy})_2(\text{Stpip})$ .

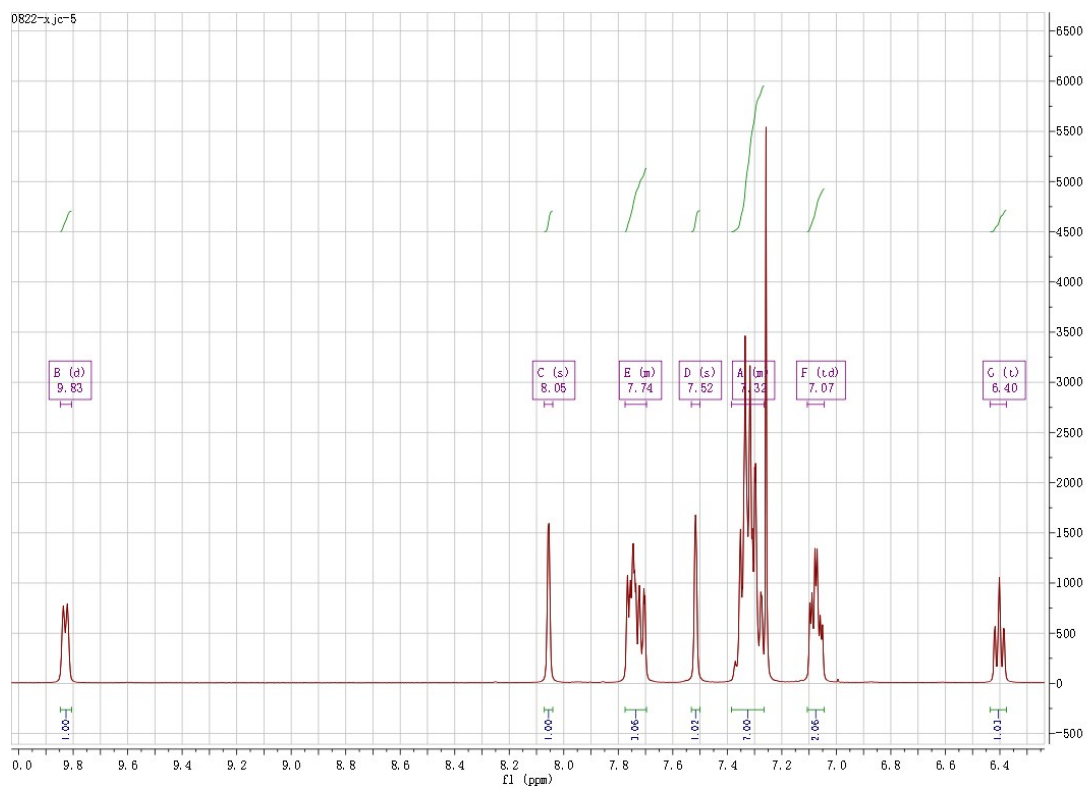

**Fig. S14** The <sup>1</sup>H NMR spectrum of Ir(tppy)<sub>2</sub>(Stpip).

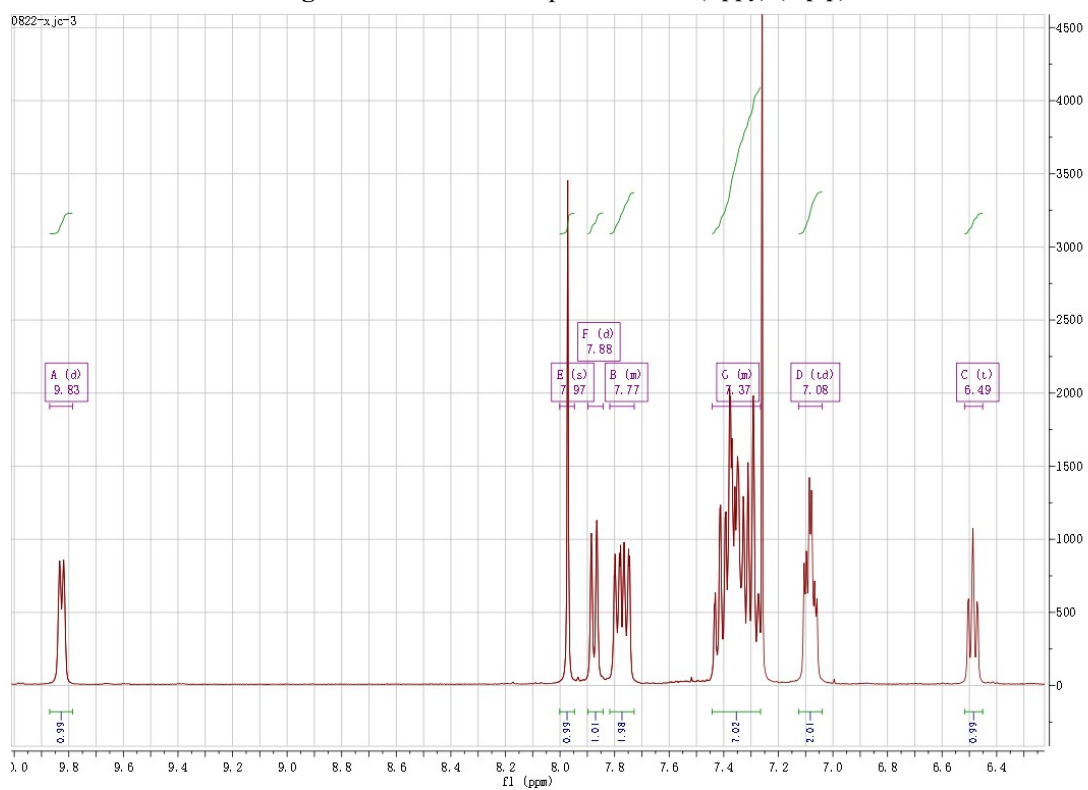

**Fig. S15** The <sup>1</sup>H NMR spectrum of Ir(tntppy)<sub>2</sub>(Stpip).

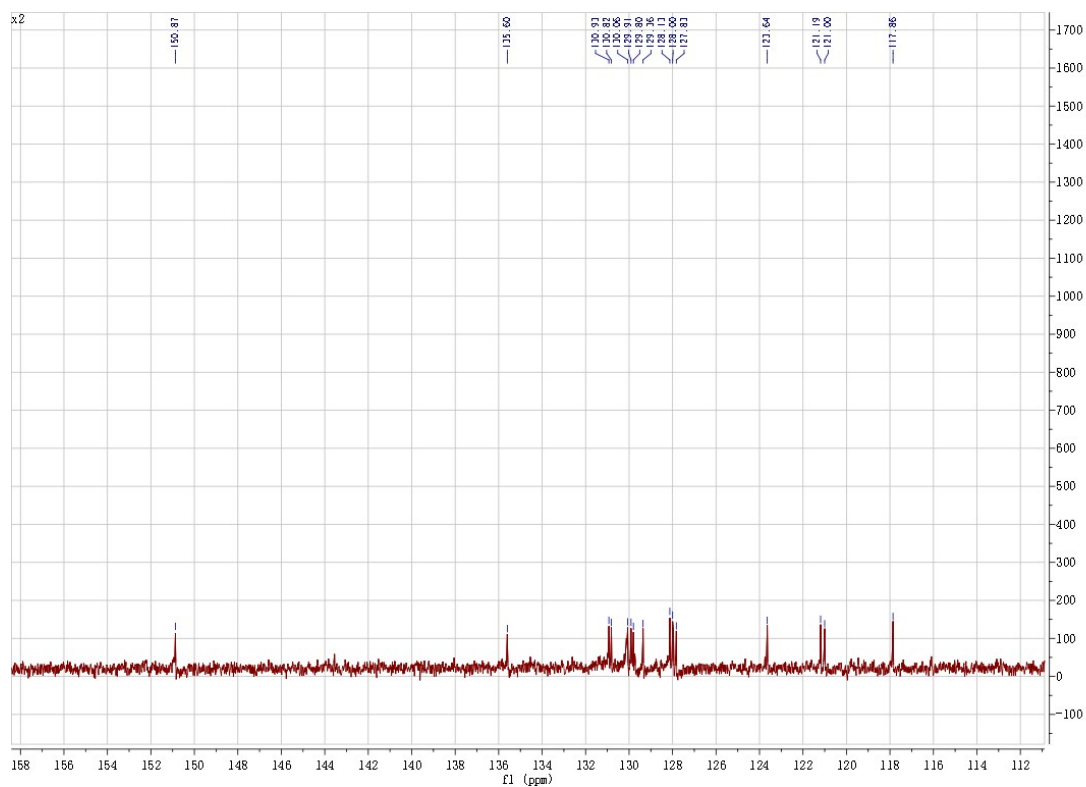

Fig. S16 The  $^{13}\text{C}$  NMR spectrum of  $\text{Ir}(\text{ppy})_2(\text{Stpip})$ .

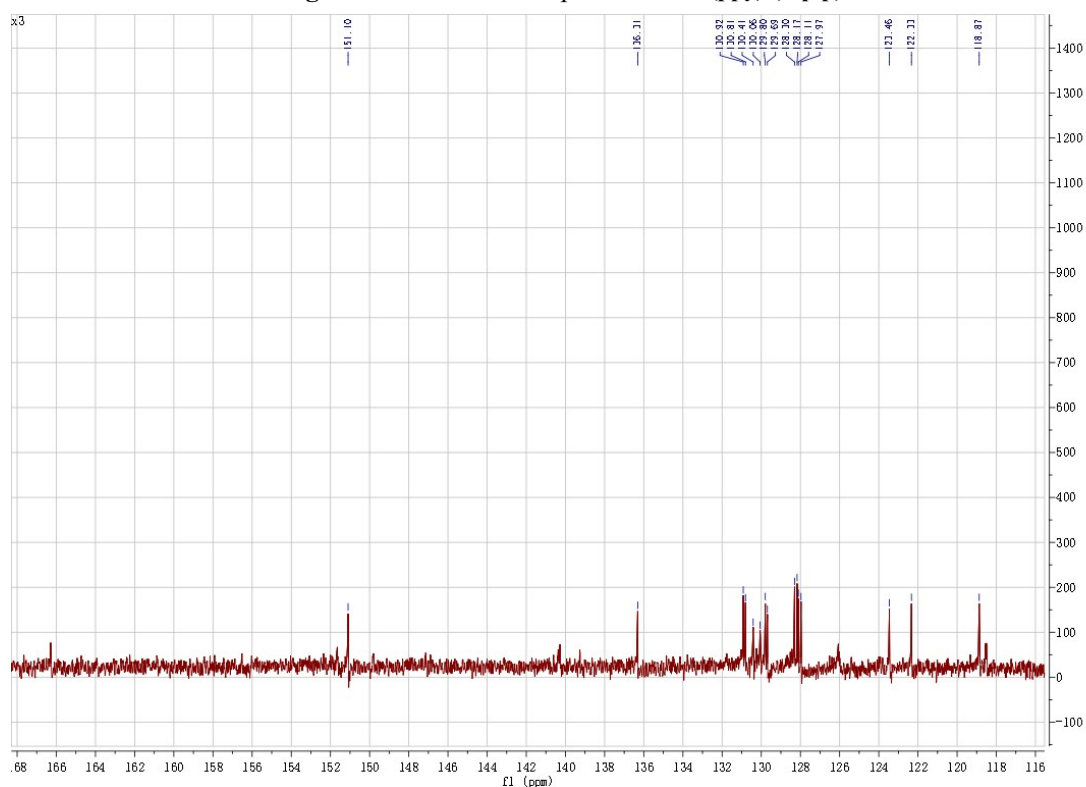

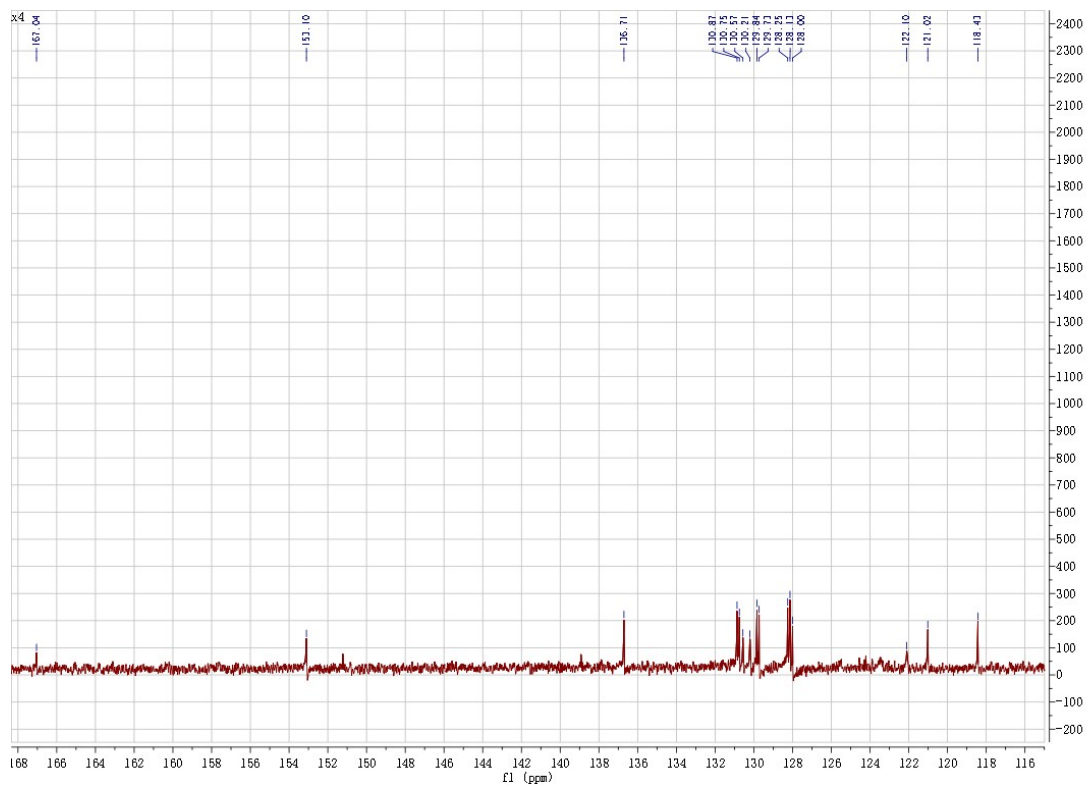

**Fig. S18** The  $^{13}\text{C}$  NMR spectrum of  $\text{Ir}(\text{tppy})_2(\text{Stpip})$ .

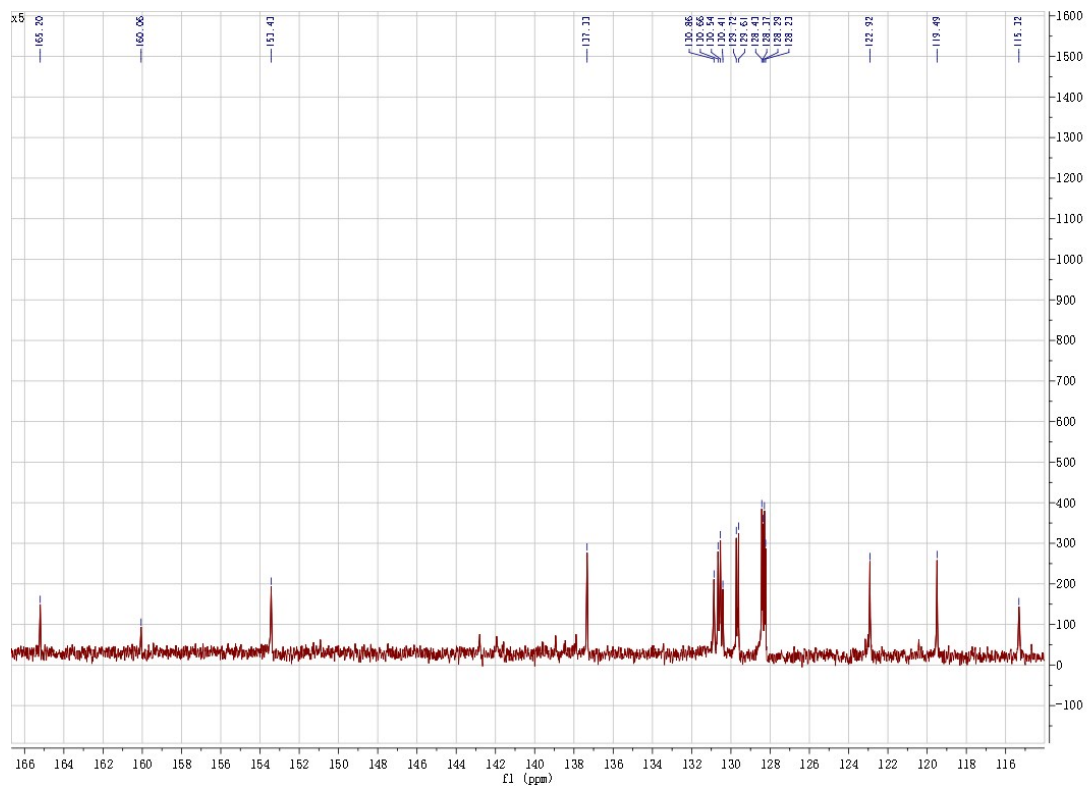

**Fig. S19** The  $^{13}\text{C}$  NMR spectrum of  $\text{Ir}(\text{tntppy})_2(\text{Stpip})$ .

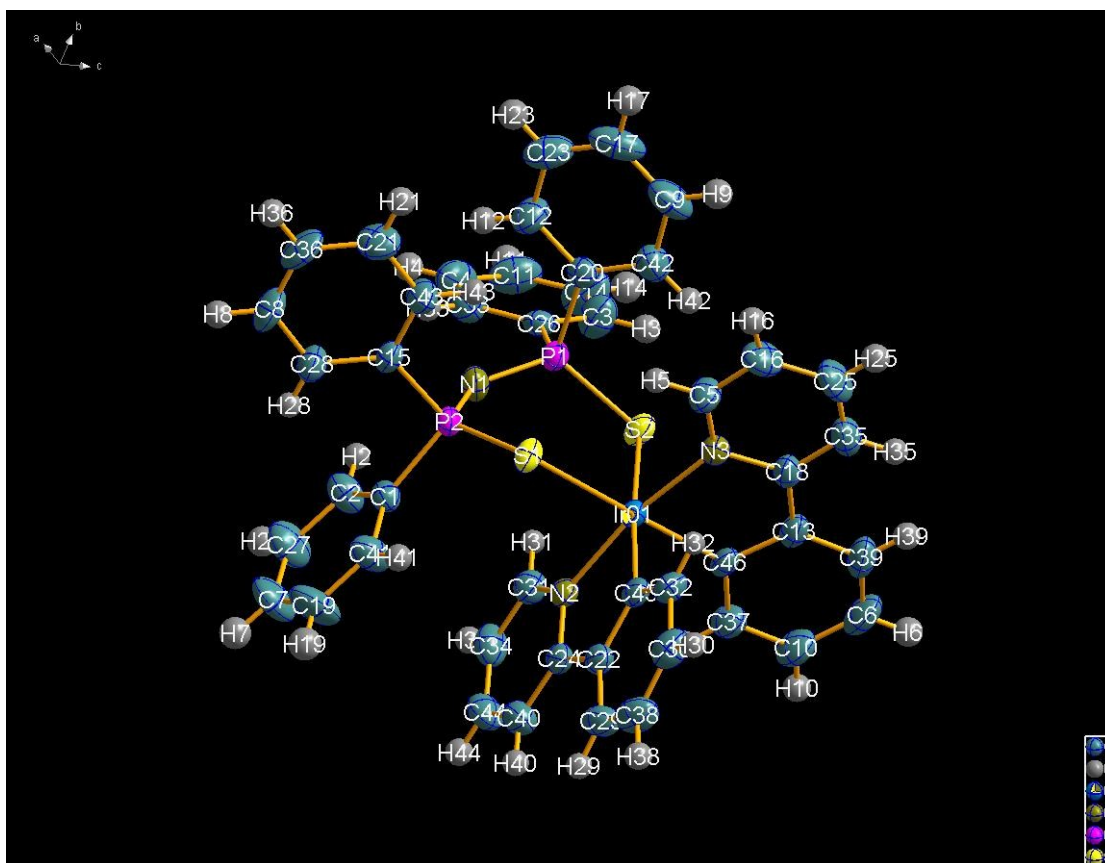

Fig. S20 Single crystal structure of  $\text{Ir}(\text{ppy})_2(\text{Stpip})$ .

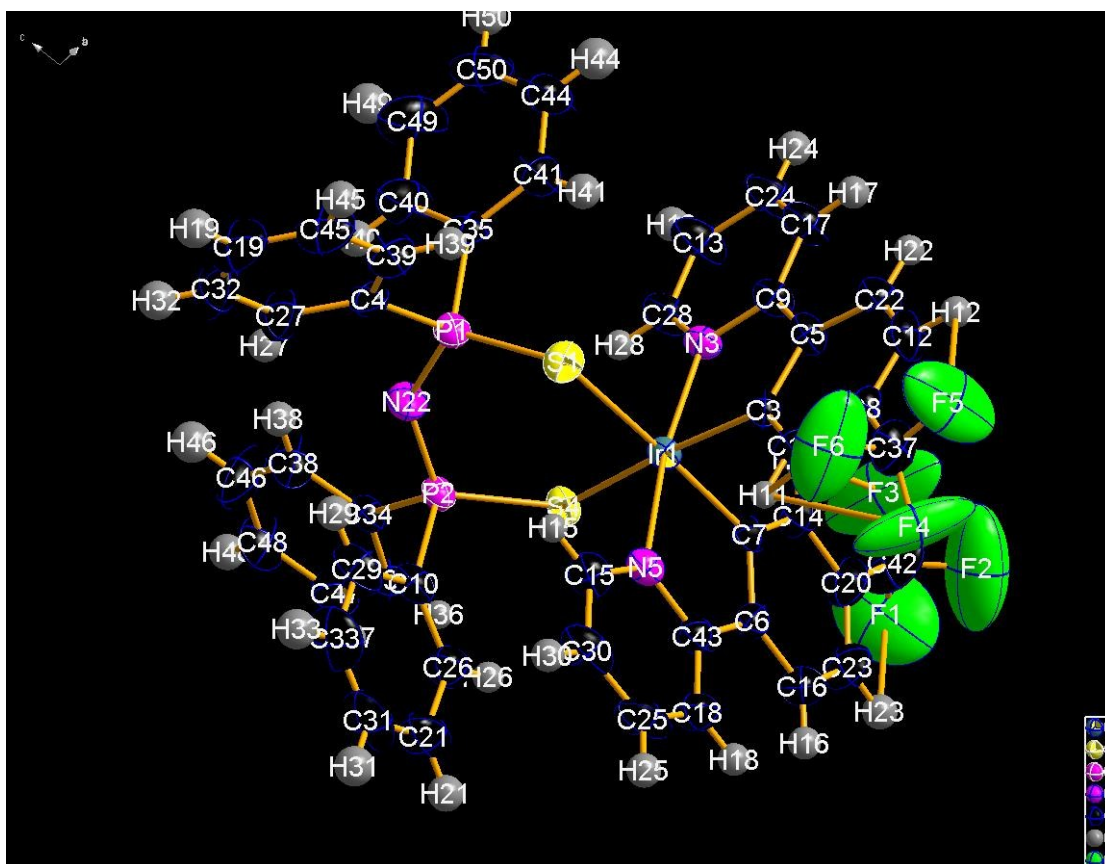

Fig. S21 Single crystal structure of  $\text{Ir}(\text{tfppy})_2(\text{Stpip})$ .

**Table S1** Crystallographic data of **Ir(ppy)<sub>2</sub>(Stpip)** and **Ir(tfppy)<sub>2</sub>(Stpip)**.

|                                                                                                                | <b>Ir(ppy)<sub>2</sub>(Stpip)</b>                                              | <b>Ir(tfppy)<sub>2</sub>(Stpip)</b>                                                           |
|----------------------------------------------------------------------------------------------------------------|--------------------------------------------------------------------------------|-----------------------------------------------------------------------------------------------|
| Formula                                                                                                        | C <sub>46</sub> H <sub>36</sub> IrN <sub>3</sub> P <sub>2</sub> S <sub>2</sub> | C <sub>48</sub> H <sub>34</sub> F <sub>6</sub> IrN <sub>3</sub> P <sub>2</sub> S <sub>2</sub> |
| FW                                                                                                             | 949.04                                                                         | 1085.04                                                                                       |
| T (K)                                                                                                          | 296                                                                            | 296                                                                                           |
| Wavelength (Å)                                                                                                 | 0.71073                                                                        | 0.71073                                                                                       |
| Crystal system                                                                                                 | Monoclinic                                                                     | Monoclinic                                                                                    |
| Space group                                                                                                    | P 2 (1)/n                                                                      | P 2 (1)/c                                                                                     |
| <i>a</i> (Å)                                                                                                   | 16.0999(9)                                                                     | 11.6027 (5)                                                                                   |
| <i>b</i> (Å)                                                                                                   | 13.7659(8)                                                                     | 16.4388 (7)                                                                                   |
| <i>c</i> (Å)                                                                                                   | 17.3693(10)                                                                    | 23.841 (1)                                                                                    |
| <i>α</i> (deg)                                                                                                 | 90.00                                                                          | 90                                                                                            |
| <i>β</i> (deg)                                                                                                 | 92.617(1)                                                                      | 101.719 (1)                                                                                   |
| <i>γ</i> (deg)                                                                                                 | 90.00                                                                          | 90                                                                                            |
| <i>V</i> (Å <sup>3</sup> )                                                                                     | 3845.5(4)                                                                      | 4452.5 (3)                                                                                    |
| <i>Z</i>                                                                                                       | 4                                                                              | 4                                                                                             |
| $\rho_{\text{calcd}}$ (Mg/m <sup>3</sup> )                                                                     | 1.639                                                                          | 1.619                                                                                         |
| $\mu$ (Mo K $\alpha$ ) (mm <sup>-1</sup> )                                                                     | 3.70                                                                           | 3.23                                                                                          |
| <i>F</i> (000)                                                                                                 | 1888                                                                           | 2144                                                                                          |
| Reflns collected                                                                                               | 25808                                                                          | 30071                                                                                         |
| Unique                                                                                                         | 8811                                                                           | 10180                                                                                         |
| Data/restraints/params                                                                                         | 8811 / 0 / 487                                                                 | 10180/18/559                                                                                  |
| GOF on <i>F</i> <sup>2</sup>                                                                                   | 0.901                                                                          | 1.038                                                                                         |
| <i>R</i> <sub>1</sub> <sup>a</sup> , <i>wR</i> <sub>2</sub> <sup>b</sup> [ <i>I</i> > 2 $\sigma$ ( <i>I</i> )] | 0.0303, 0.0637                                                                 | 0.0384,0.0860                                                                                 |
| <i>R</i> <sub>1</sub> <sup>a</sup> , <i>wR</i> <sub>2</sub> <sup>b</sup> (all data)                            | 0.0494, 0.0723                                                                 | 0.0587,0.0940                                                                                 |
| CCDC NO                                                                                                        | 1838724                                                                        | 1838723                                                                                       |

$$R_1^a = \frac{\sum ||F_o| - |F_c||}{\sum F_o}, \quad wR_2^b = [\frac{\sum w(F_o^2 - F_c^2)^2}{\sum w(F_o^2)}]^{1/2}$$

**Table S2** Selected bond lengths and angles of **Ir(ppy)<sub>2</sub>(Stpip)** and **Ir(tfppy)<sub>2</sub>(Stpip)**.

| <b>Ir(ppy)<sub>2</sub>(Stpip)</b> |                  | <b>Ir(tfppy)<sub>2</sub>(Stpip)</b> |                  |
|-----------------------------------|------------------|-------------------------------------|------------------|
| Selected bonds                    | Bond lengths (Å) | Selected bonds                      | Bond lengths (Å) |
| Ir01 C46                          | 2.010(4)         | Ir1 C7                              | 2.016(5)         |
| Ir01 C45                          | 2.014(4)         | Ir1 C3                              | 2.028(5)         |
| Ir01 N3                           | 2.054(3)         | Ir1 N3                              | 2.056(4)         |
| Ir01 N2                           | 2.063(3)         | Ir1 N5                              | 2.060(4)         |
| Ir01 S1                           | 2.4883(9)        | Ir1 S4                              | 2.4760(12)       |
| Ir01 S2                           | 2.4987(10)       | Ir1 S1                              | 2.4923(13)       |
| Selected angles                   | ( ° )            | Selected angles                     | ( ° )            |
| C46 Ir01 C45                      | 88.32(14)        | C7 Ir1 C3                           | 89.98(19)        |
| C46 Ir01 N3                       | 80.61(14)        | C7 Ir1 N3                           | 94.14(18)        |
| C45 Ir01 N3                       | 93.22(14)        | C3 Ir1 N3                           | 80.31(18)        |
| C46 Ir01 N2                       | 91.64(14)        | C7 Ir1 N5                           | 80.26(18)        |
| C45 Ir01 N2                       | 80.25(14)        | C3 Ir1 N5                           | 93.40(18)        |
| N3 Ir01 N2                        | 170.05(12)       | N3 Ir1 N5                           | 171.64(17)       |
| C46 Ir01 S1                       | 173.41(11)       | C7 Ir1 S4                           | 81.71(14)        |
| C45 Ir01 S1                       | 87.05(10)        | C3 Ir1 S4                           | 169.56(14)       |
| N3 Ir01 S1                        | 94.96(9)         | N3 Ir1 S4                           | 93.92(11)        |
| N2 Ir01 S1                        | 92.20(9)         | N5 Ir1 S4                           | 91.43(11)        |
| C46 Ir01 S2                       | 84.53(10)        | C7 Ir1 S1                           | 173.28(15)       |
| C45 Ir01 S2                       | 171.97(10)       | C3 Ir1 S1                           | 86.72(14)        |
| N3 Ir01 S2                        | 89.21(9)         | N3 Ir1 S1                           | 91.07(12)        |
| N2 Ir01 S2                        | 96.29(9)         | N5 Ir1 S1                           | 94.08(12)        |
| S1 Ir01 S2                        | 100.37(3)        | S4 Ir1 S1                           | 102.17(4)        |



**Table S3** Data of theoretical calculation of orbital energy level and electron cloud distribution

| Complex                             | Orbital | Energy/eV | $E_{\text{gap}}/\text{eV}$ | Composition (%) |              |                   |
|-------------------------------------|---------|-----------|----------------------------|-----------------|--------------|-------------------|
|                                     |         |           |                            | Ir              | Main ligands | Ancillary ligands |
| <b>Ir(ppy)<sub>2</sub>(Stpip)</b>   | HOMO    | -5.33     | 3.82                       | 50.13           | 36.09        | 13.78             |
|                                     | LUMO    | -1.51     |                            | 4.84            | 54.31        | 40.84             |
| <b>Ir(tfppy)<sub>2</sub>(Stpip)</b> | HOMO    | -5.58     | 3.78                       | 50.12           | 35.88        | 13.99             |
|                                     | LUMO    | -1.80     |                            | 3.72            | 70.85        | 25.43             |
| <b>Ir(ttpy)<sub>2</sub>(Stpip)</b>  | HOMO    | -5.90     | 4.16                       | 47.76           | 46.29        | 5.95              |
|                                     | LUMO    | -1.74     |                            | 4.52            | 89.13        | 6.35              |
| <b>Ir(tntpy)<sub>2</sub>(Stpip)</b> | HOMO    | -6.05     | 3.94                       | 25.77           | 6.67         | 67.57             |
|                                     | LUMO    | -2.11     |                            | 3.63            | 91.33        | 5.04              |
